# Supplementary material
Source: PubMed Central journal article supplement (PMC7469431)

---

**Author(s) and Year****Prevalence [95% CI]*****Hospital-based Studies***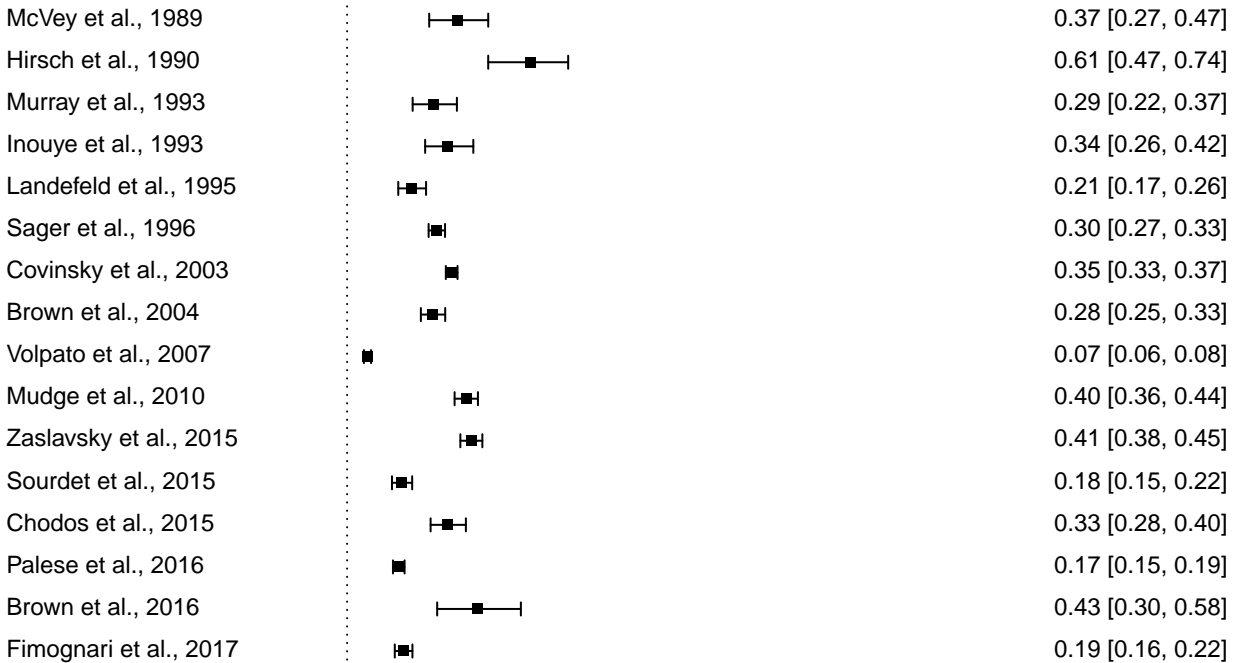***Community-based Studies***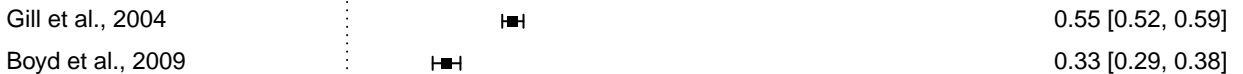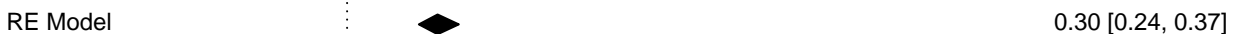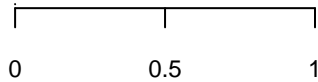

Prevalence

Supplement: NIHMS1614918-supplement-Supplemental_Figure_2.pdf [file NIHMS1614918-supplement-Supplemental_Figure_2.pdf]

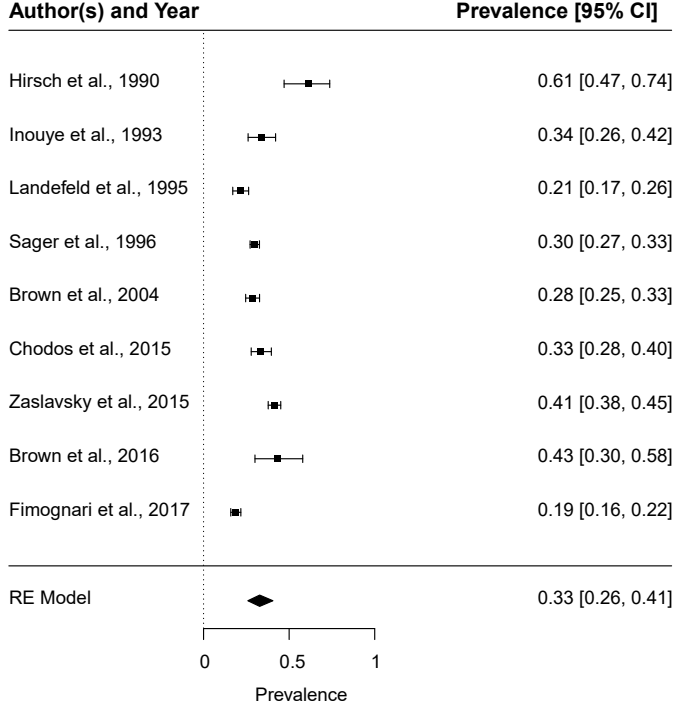

Supplement: NIHMS1614918-supplement-Supplemental_Figure_6.pdf [file NIHMS1614918-supplement-Supplemental_Figure_6.pdf]
